# Potential for Zika virus to establish a sylvatic transmission cycle in the Americas

Benjamin M. Althouse, PhD, ScM<sup>1,2,6</sup>, Nikos Vasilakis, PhD<sup>3</sup>, Amadou A. Sall, PhD<sup>4</sup>, Mawlouth Diallo, PhD<sup>4</sup>, Scott C. Weaver, PhD<sup>5</sup>, and Kathryn A. Hanley, PhD<sup>6</sup>

<sup>1</sup>Institute for Disease Modeling, Bellevue, WA

<sup>2</sup>Santa Fe Institute, Santa Fe, NM

<sup>3</sup>Department of Pathology and Center for Biodefense and Emerging Infectious Diseases, Center for Tropical Diseases and Institute for Human Infections and Immunity, The University of Texas Medical Branch, Galveston TX, USA

<sup>4</sup>Institut Pasteur de Dakar, Dakar, Senegal

<sup>5</sup>Institute for Human Infections and Immunity and Departments of Pathology, Microbiology & Immunology, University of Texas Medical Branch, Galveston, TX

<sup>6</sup>Department of Biology, New Mexico State University, Las Cruces, NM

## Corresponding author:

Benjamin M. Althouse, PhD, ScM  
Institute for Disease Modeling  
3150 139th Ave SE  
Bellevue, WA, 98005

Santa Fe Institute, Santa Fe, NM  
New Mexico State University, Las Cruces, NM

email: [balthouse@intven.com](mailto:balthouse@intven.com)  
phone: 425-777-9615

Word count: about 2250 words

## Abstract

Zika virus (ZIKV) originated and continues to circulate in a sylvatic transmission cycle between non-human primate hosts and arboreal mosquitoes in tropical Africa. Recently ZIKV invaded the Americas, where it poses a threat to human health, especially to pregnant women and their infants. Here we examine the risk that ZIKV will establish a sylvatic cycle in the Americas, focusing on Brazil. We review the natural history of sylvatic ZIKV and present a mathematical dynamic transmission model to assess the probability of establishment of a sylvatic ZIKV transmission cycle in non-human primates and/or other mammals and arboreal mosquito vectors in Brazil. Brazil is home to multiple species of primates and mosquitoes potentially capable of ZIKV transmission, though direct assessment of host competence (ability to mount viremia sufficient to infect a feeding mosquito) and vector competence (ability to become infected with ZIKV and disseminate and transmit upon subsequent feedings) of New World species is lacking. Modeling reveals a high probability of establishment of sylvatic ZIKV across a large range of biologically plausible parameters. Probability of establishment is dependent on host population sizes and birthrates and ZIKV force of infection, but a network of as few as 6,000 primates with 10,000 mosquitoes is capable of supporting establishment of a ZIKV sylvatic cycle. Research on the susceptibility of New World monkeys or other small mammals to ZIKV, on the vector competence of New World *Aedes*, *Sabethes*, and *Haemagogus* mosquitoes for ZIKV, and on the geographic range of these species is urgently needed. A sylvatic cycle of ZIKV would make future elimination efforts in the Americas practically impossible, and paints a dire situation for the epidemiology of ZIKV and ending the ongoing outbreak of congenital Zika syndrome.

## keywords

Zika virus, arbovirus, sylvatic transmission, enzootic transmission, mathematical modeling, primates, mosquitoes

# 1 Introduction

2 The invasion of Brazil by Zika virus (ZIKV) is the latest upheaval in a decade-long cat-  
 3 aclysm in the epidemiology of viruses transmitted by the mosquito *Aedes aegypti* in the  
 4 Americas [1, 2]. Dengue virus (DENV) made forays into Florida in 2009 [3], Arizona in 2014  
 5 and Hawaii in 2015 [4]; chikungunya virus (CHIKV) was introduced into the Caribbean  
 6 in 2013 and hurtled across both Central and South America [5]; and, in 2015, Zika virus  
 7 (ZIKV) was first detected in Brazil. With ZIKV came a spike in cases of congenital mi-  
 8 crocephaly and Guillain-Barre syndrome [2, 6]. The introduction of ZIKV to the Americas  
 9 had been predicted well in advance of the event [7, 8], however, the association of ZIKV  
 10 infection with neuropathology and teratogenicity were only revealed during the spread of  
 11 the virus through the Pacific and into Brazil. Hayes [7] did warn in 2009 that the spread of  
 12 ZIKV warranted concern despite lack of contemporary evidence for severe ZIKV disease.  
 13 He reminded the scientific community that West Nile virus was also considered a “rela-  
 14 tively innocuous pathogen” until it ushered outbreaks of neuroinvasive disease into Europe  
 15 and the Americas. In response to a growing body of evidence linking ZIKV infection with  
 16 teratogenic effects [9, 10, 11], the World Health Organization declared the ZIKV outbreak  
 17 a public health emergency of international concern in February of 2016 [1, 12].

18 ZIKV is unusual among the arthropod-borne viruses (arboviruses) in its capacity for  
 19 sustained transmission in a human-endemic cycle. This capacity is shared by three other  
 20 arboviruses that are also, not coincidentally, transmitted in the human cycle by *Aedes*  
 21 *aegypti*: DENV, CHIKV and yellow fever virus (YFV). For all four viruses, human-endemic  
 22 lineages emerged from ecologically and evolutionarily distinct, sylvatic, enzootic cycles  
 23 transmitted between mostly arboreal *Aedes* spp. vectors and non-human animal hosts [7,  
 24 13, 14]. While non-human primates (hereafter primates) have generally been considered the  
 25 major reservoir hosts for the sylvatic transmission cycle of all four viruses, this paradigm is

26 based on scant evidence and researchers in the field have repeatedly cautioned that other  
 27 animal species may play key roles in the transmission dynamics of these viruses [15, 16,  
 28 13, 7]. The ancestral sylvatic cycles of YFV, CHIKV and ZIKV occur in Africa, while the  
 29 DENV ancestral cycle occurs in Southeast Asia with later transport to West Africa and  
 30 enzootic establishment [17]. YFV was transported from Africa to the Americas in infected  
 31 humans and mosquitoes via the slave trade in the 17th and 18th centuries [18] and spilled  
 32 back into a sylvatic cycle, maintained in New World monkey species, which persists today.  
 33 Dengue virus, in contrast, has not spawned an established a sylvatic transmission cycle  
 34 in the Americas despite widespread circulation of the virus across the Americas in the  
 35 human-endemic cycle [13].

36 Whether ZIKV will emulate YFV or DENV is an open and urgent question. If the virus  
 37 establishes a sylvatic cycle in the Americas, then mosquito control and even vaccination  
 38 will not suffice to eradicate it from the region. ZIKV was first isolated in 1947 from a  
 39 sentinel monkey in the Ziika forest of Uganda. Intriguingly the sentinel species used was  
 40 the rhesus macaque, demonstrating the susceptibility of Asian primates to ZIKV. The  
 41 next year ZIKV was isolated from *Ae. africanus* in the area, suggesting mosquito-borne  
 42 transmission of the virus. As laid out in the comprehensive review by Hayes, the virus was  
 43 subsequently detected across a wide swath of tropical Africa via serosurveys of monkeys  
 44 as well as virus isolation from monkeys and several species of sylvatic *Aedes* [7]. Notably  
 45 these mosquitoes were collected in the forest canopy but also on the forest floor. Infection  
 46 of humans living in proximity to sylvatic cycles was detected via serosurveys and clinical  
 47 surveillance. Seroprevalence was variable and quite high (up to 40%) in some human  
 48 populations, but disease was invariably mild, generally manifesting as fever, headache,  
 49 rash and conjunctivitis. In 2007, an outbreak of ZIKV in Libreville, the capital of Gabon  
 50 was thought to have been vectored by the peri-urban mosquito species *Aedes albopictus* [19].

51 Importantly, experimental studies of the interaction among different African arboviruses  
52 have shown evidence for both enhancement [20, 21] and interference [7].

53 Over the same time period that the ZIKV transmission cycle was being investigated in  
54 Africa, circulation of ZIKV was documented in several countries in Asia. Albert Rudnick,  
55 the pioneer of sylvatic DENV research, isolated the virus from *Ae. aegypti* in Malaysia [22].  
56 A serological study in 1977-78 in Central Java revealed that a high percentage of febrile  
57 patients had antibodies against ZIKV [23]. Subsequently ZIKV infection was documented  
58 in travellers returning from Indonesia [24], Thailand [25], and Malaysia [26] and in residents  
59 of Indonesia [27], Cambodia [28], the Philippines [29], and Thailand [30]. One of the cases  
60 of Zika infection in a traveller was notable as disease onset occurred five days after being  
61 bitten by a monkey in Indonesia [31]. Anti-ZIKV antibodies have also been detected  
62 semi-captive orangutans in Malaysia [32] To date there has been no solid evidence of an  
63 Asian sylvatic cycle of ZIKV, but such a sylvatic cycle could be widespread and still go  
64 undetected due to the lack of surveillance for sylvatic arboviruses in Southeast Asia [33].  
65 Thus it remains uncertain whether all human ZIKV infections in Asia derive from the  
66 human-endemic cycle or whether some may occur due to spillover from an as-yet unknown  
67 sylvatic cycle in the region. The lineage of ZIKV that circulates in Asia is distinct from  
68 the African lineages of the virus, and it is the Asian lineage that spread across the Pacific  
69 and into Brazil [34].

70 Research on the sylvatic cycle of ZIKV since 2007 has focused primarily on West Africa.  
71 Phylogenetic analysis indicates that the virus has been introduced into West Africa at least  
72 twice in the twentieth century [35] and that West Africa contains ZIKV strains that are  
73 distinct from those elsewhere in Africa [36]. Analyses of mosquitoes collected annually  
74 over the last fifty years in Kedougou, Senegal demonstrated that ZIKV is amplified in  
75 mosquito collections at four year intervals, that rainfall is a positive predictor of ZIKV

isolations in mosquitoes, and that there was little positive or negative association between amplification of ZIKV and of three other *Aedes*-borne arboviruses that circulate in the region, YFV, DENV-2 and CHIKV [37]. Moreover our field studies in Kedougou during the 2011 ZIKV amplification showed that the virus was present in all major land cover classes in the region but was detected significantly more often in the forest than in other land cover types [38]. In this study, ZIKV was detected in ten separate species of *Aedes*, with *Ae. hirsutus*, *Ae. unilineatus*, *Ae. metallicus*, and *Ae. africanus* having the highest minimum infection rates of collected species. In addition, one pool of male *Ae. furcifer* was found to be positive, indicating possible vertical transmission of ZIKV. To follow up these field observations, Diagne et al. tested the vector competence of multiple Senegalese *Aedes* species for ZIKV in the laboratory and found that only *Ae. luteocephalus* and *Ae. vittatus* were capable of transmitting the virus [39]. ZIKV has previously been isolated from two of the three monkeys species resident in Kedougou: African green monkeys (*Chlorocebus sabaeus*) and patas monkeys (*Erythrocebus patas*) (reviewed in [40]) In combination with previous field studies in Africa, these findings demonstrate that the transmission dynamics of ZIKV are complex and that a diverse network of *Aedes* vector species and primate host species participate in the maintenance of the sylvatic ZIKV cycle.

Here, we used a mathematical model that we have previously employed to study the sylvatic DENV cycle in Senegal [41] to identify the conditions of host and vector density and connectivity that would permit the establishment of an American sylvatic cycle of ZIKV.

## Establishing a sylvatic ZIKV cycle

Our model extends, to our knowledge, the only previous dynamic model of mosquito-borne viruses in non-human primate hosts [41, 42]. While the Althouse et al. (2012)

study was focused on sylvatic DENV, the strong similarities between sylvatic DENV and sylvatic ZIKV transmission cycle make the model a good fit for both viruses. Here we use the model to ask whether ZIKV will establish a self-sustaining transmission cycle in a network of two susceptible host populations with two corresponding competent vector mosquito populations after introduction of a single ZIKV-infected host. We assume host and vector species interact as separate populations, and thus populations correspond to separate species. Further, we assume that each host population has a vector population that is source of the largest number of bites that could transmit ZIKV, indicating vector preference, with a vector biting its preferred host 100 times more frequently than its non-preferred hosts. Our previous work suggests that this non-preferred biting synchronizes transmission in the two populations and the synchrony is qualitatively unrelated to the ratio of preferred to non-preferred biting [41]. Here we explore primates and mosquitoes as the hosts and vectors, with Althouse et al. (2012) and Althouse and Hanley (2015) giving full model details.

Briefly, mosquitoes and primates are born susceptible to ZIKV infection, and are infected at a rate proportional to the number of bites given or received per day and a probability of infection. Primate species differ in their life history, particularly birthrate and lifespan. We assume birthrate =  $1/\text{lifespan}$ , which is conservative as age of fertility completion is younger than age of mortality for many primates [43]. Transmission probabilities vary seasonally due to differences in rainfall and temperature [37]. We explore three per-bite infection probabilities (0.3, 0.6, 0.9) with an average of 0.5 infectious bites per day. This gives forces of infection 0.15, 0.3, 0.45, which is in line with observed sylvatic DENV forces of infection from primate collections in Kedougou, Senegal in 2010-2012 (Sall, Diallo, Althouse, Hanley, Weaver, unpublished data). These forces of infection ranged from 0.09 (95% CI: 0.07, 0.11) for Guinea baboons (*Papio papio*) in 2012, to 0.41 (95% CI: 0.26,

0.76) for African green monkeys (*Chlorocebus sabaeus*) in 2012. After infection, primates recover at a fixed rate (4 days [44]) while mosquitoes are infected for the remainder of their life. We employ the stochastic version of the model simulated using a Gillespie stochastic simulation algorithm with the Binomial Tau leap approximation (BTL) to examine the effects of population size, primate birthrate, and force of infection on the probability of ZIKV establishment. Simulations were run and we calculated the proportion of simulations not becoming extinct after introduction of a ZIKV infected host (ie, establishing a sylvatic cycle).

Model simulations suggest the probability of establishment is highly dependent on the primate birthrate (Figure 1). In low and medium force of infection settings (0.15 and 0.3) primates with lifespans of 15 and 25 years show little probability of sylvatic establishment (panels d, g, h). However, if there exists a rapidly reproducing primate (lifespan of 5 years), establishment of a sylvatic cycle is nearly assured (panels a, b, c). Generally, increasing numbers of primates relative to mosquitoes lowers the probability of establishment, as might be expected as the force of infection is directly proportional to the number of mosquitoes and inversely proportional to the number of primates [37]. A network of as few as 6,000 primates with 10,000 mosquitoes is capable of supporting the establishment of a ZIKV sylvatic cycle.

## Outlook

To our knowledge, the susceptibility of New World monkeys to ZIKV has never been tested, and it is possible that they are insusceptible to ZIKV infection or generate only low levels of viremia insufficient to infect potential sylvatic vectors. However, as we have pointed out in a previous review, there are free-living populations of several Old World monkey species in the Americas, some of which, notably African green monkeys (which as noted above had



high forces of sylvatic DENV infection in Senegal) are known to be hosts of sylvatic ZIKV in Africa [13]. Our model predicts that the presence of a rapidly reproducing primate or other mammal that is a competent host for ZIKV vastly increases the chances of establishment. There is some serological evidence that vertebrates other than primates may also serve as enzootic reservoirs of ZIKV [27, 45]. Again, ZIKV susceptibility testing of potential small mammal hosts is lacking and should be a high priority for future research.

We also do not know the susceptibility of most New World *Aedes* species for ZIKV. However, it has recently been shown that *Ae. albopictus* was likely the primary vector of a ZIKV outbreak in humans in Gabon [19]. This mosquito species, which is common in the Americas, has a broad host range and has high potential to serve as a bridge vector to transfer the virus from humans to non-human animals [46]. Additionally, *Sabethes* and *Haemagogus* spp mosquitoes are tropical New World vectors of sylvatic YFV and thus may be likely vectors of sylvatic ZIKV as well [13].

The current work is limited by gaps in knowledge, and relies on sylvatic ZIKV transmission dynamics being similar to sylvatic DENV transmission – a reasonable assumption given the extensive overlap of the two viruses in the hosts and vectors used in West African sylvatic cycles [7, 13, 38]. We note that our model calculates the probability of ZIKV establishment starting from a single infectious introduction without further importation, and does not include vertical transmission of ZIKV within mosquitoes. These features both make our estimates conservative and potentially paint a dire situation for the epidemiology of ZIKV and for prospects of extinguishing the ongoing congenital Zika syndrome outbreak in Brazil.

The International Task Force for Disease Eradication identifies a key factor for considering a disease eradicable as epidemiologic vulnerability, including not having the presence of an animal reservoir [47]. Establishment of a sylvatic cycle of ZIKV would make future

elimination efforts in the Americas extremely difficult if not impossible. Taking lessons from sylvatic YFV in Brazil, reactive, and massive vaccination efforts will be necessary when a ZIKV vaccine becomes available to control ZIKV transmission [48], decrease morbidity, and protect unborn infants from potential teratogenic effects. We use this work to identify and highlight key lines of research that would enable the public health community to understand ZIKV transmission going forward and target surveillance for enzootic ZIKV to those animal populations most likely to sustain virus transmission.

**Acknowledgements:** We greatly acknowledge NSF-RCN on Infectious Disease Evolution Across Scales program. This work was supported by grants 1R15AI113628-01 (KAH), RO1AI069145 (BMA, SCW, KAH), R24AI120942 (SCW) from the U.S. National Institutes of Health. The funders had no role in study design, data collection and analysis, decision to publish, or preparation of the manuscript.

## References

- [1] M. Hennessey, “Zika virus spreads to new areas—region of the americas, may 2015–january 2016,” *MMWR. Morbidity and Mortality Weekly Report*, vol. 65, 2016.
- [2] A. S. Fauci and D. M. Morens, “Zika virus in the americas—yet another arbovirus threat,” *New England Journal of Medicine*, 2016.
- [3] E. G. Radke, C. J. Gregory, K. W. Kintziger, E. K. Sauber-Schatz, E. A. Hunsperger, G. R. Gallagher, J. M. Barber, B. J. Biggerstaff, D. R. Stanek, K. M. Tomashek, *et al.*, “Dengue outbreak in key west, florida, usa, 2009,” *Emerg Infect Dis*, vol. 18, no. 1, pp. 135–137, 2012.
- [4] D. Johnston, “Notes from the field: Outbreak of locally acquired cases of dengue fever—hawaii, 2015,” *MMWR. Morbidity and Mortality Weekly Report*, vol. 65, 2016.
- [5] E. W. Champion, S. C. Weaver, and M. Lecuit, “Chikungunya virus and the global spread of a mosquito-borne disease,” *New England Journal of Medicine*, vol. 372, no. 13, pp. 1231–1239, 2015.
- [6] V.-M. Cao-Lormeau, A. Blake, S. Mons, S. Lastère, C. Roche, J. Vanhomwegen, T. Dub, L. Baudouin, A. Teissier, P. Larre, *et al.*, “Guillain-barré syndrome outbreak associated with zika virus infection in french polynesia: a case-control study,” *The Lancet*, 2016.
- [7] E. B. Hayes, “Zika virus outside africa,” *Emerg Infect Dis*, vol. 15, pp. 1347–50, Sep 2009.

- 203 [8] S. C. Weaver and W. K. Reisen, "Present and future arboviral threats," *Antiviral research*,  
204 vol. 85, no. 2, pp. 328–345, 2010.
- 205 [9] G. Calvet, R. S. Aguiar, A. S. Melo, S. A. Sampaio, I. de Filippis, A. Fabri, E. S. Araujo,  
206 P. C. de Sequeira, M. C. de Mendonça, L. de Oliveira, *et al.*, "Detection and sequencing of  
207 zika virus from amniotic fluid of fetuses with microcephaly in brazil: a case study," *The Lancet*  
208 *Infectious Diseases*, 2016.
- 209 [10] J. Mlakar, M. Korva, N. Tul, M. Popović, M. Poljšak-Prijatelj, J. Mraz, M. Kolenc, K. Res-  
210 man Rus, T. Vesnaver Vipotnik, V. Fabjan Vodusek, *et al.*, "Zika virus associated with micro-  
211 cephal," *New England Journal of Medicine*, vol. 374, no. 10, pp. 951–958, 2016.
- 212 [11] E. J. Rubin, M. F. Greene, and L. R. Baden, "Zika virus and microcephaly," *New England*  
213 *Journal of Medicine*, 2016.
- 214 [12] D. L. Heymann, A. Hodgson, A. A. Sall, D. O. Freedman, J. E. Staples, F. Althabe, K. Baruah,  
215 G. Mahmud, N. Kandun, P. Vasconcelos, *et al.*, "Zika virus and microcephaly: why is this  
216 situation a pheic?," *Lancet (London, England)*, vol. 387, no. 10020, p. 719, 2016.
- 217 [13] K. A. Hanley, T. P. Monath, S. C. Weaver, S. L. Rossi, R. L. Richman, and N. Vasilakis,  
218 "Fever versus fever: The role of host and vector susceptibility and interspecific competition in  
219 shaping the current and future distributions of the sylvatic cycles of dengue virus and yellow  
220 fever virus," *Infect Genet Evol*, Mar 2013.
- 221 [14] S. C. Weaver and N. L. Forrester, "Chikungunya: Evolutionary history and recent epidemic  
222 spread," *Antiviral research*, vol. 120, pp. 32–39, 2015.
- 223 [15] D. Diallo, R. Chen, C. T. Diagne, Y. Ba, I. Dia, A. A. Sall, S. C. Weaver, and M. Diallo,  
224 "Bloodfeeding patterns of sylvatic arbovirus vectors in southeastern senegal," *Transactions of*  
225 *The Royal Society of Tropical Medicine and Hygiene*, vol. 107, no. 3, pp. 200–203, 2013.
- 226 [16] C. Chevillon, L. Briant, F. Renaud, and C. Devaux, "The chikungunya threat: an ecological  
227 and evolutionary perspective," *Trends in microbiology*, vol. 16, no. 2, pp. 80–88, 2008.
- 228 [17] E. Wang, H. Ni, R. Xu, A. D. Barrett, S. J. Watowich, D. J. Gubler, and S. C. Weaver, "Evo-  
229 lutionary relationships of endemic/epidemic and sylvatic dengue viruses," *Journal of virology*,  
230 vol. 74, no. 7, pp. 3227–3234, 2000.
- 231 [18] J. E. Bryant, E. C. Holmes, and A. D. Barrett, "Out of africa: a molecular perspective on the  
232 introduction of yellow fever virus into the americas," *PLoS Pathog*, vol. 3, no. 5, p. e75, 2007.
- 233 [19] G. Grard, M. Caron, I. M. Mombo, D. Nkoghe, S. M. Ondo, D. Jiolle, D. Fontenille, C. Paupy,  
234 and E. M. Leroy, "Zika virus in gabon (central africa)–2007: a new threat from aedes albopic-  
235 tus?," *PLoS Negl Trop Dis*, vol. 8, no. 2, p. e2681, 2014.
- 236 [20] A. Fagbami, S. Halstead, N. Marchette, and K. Larsen, "Cross-infection enhancement among  
237 african flaviviruses by immune mouse ascitic fluids.," *Cytobios*, vol. 49, no. 196, pp. 49–55,  
238 1986.
- 239 [21] A. Fagbami and S. Halstead, "Antibody-mediated enhancement of wesselsbron virus in p388d1  
240 cells.," *African journal of medicine and medical sciences*, vol. 15, no. 3-4, pp. 103–107, 1985.

- 241 [22] N. Marchette, R. Garcia, A. Rudnick, *et al.*, “Isolation of zika virus from aedes aegypti  
242 mosquitoes in malaysia.,” *American Journal of Tropical Medicine and Hygiene*, vol. 18, no. 3,  
243 pp. 411–415, 1969.
- 244 [23] J. Olson, T. Ksiazek, *et al.*, “Zika virus, a cause of fever in central java, indonesia,” *Transactions*  
245 *of the Royal Society of Tropical Medicine and Hygiene*, vol. 75, no. 3, pp. 389–393, 1981.
- 246 [24] J. C. Kwong, J. D. Druce, and K. Leder, “Zika virus infection acquired during brief travel to  
247 indonesia,” *The American journal of tropical medicine and hygiene*, vol. 89, no. 3, pp. 516–517,  
248 2013.
- 249 [25] K. Fonseca, B. Meatherall, D. Zarra, M. Drebot, J. MacDonald, K. Pabbaraju, S. Wong,  
250 P. Webster, R. Lindsay, and R. Tellier, “First case of zika virus infection in a returning canadian  
251 traveler,” *The American journal of tropical medicine and hygiene*, vol. 91, no. 5, pp. 1035–1038,  
252 2014.
- 253 [26] D. Tappe, S. Nachtigall, A. Kapaun, P. Schnitzler, S. Günther, and J. Schmidt-Chanasit,  
254 “Acute zika virus infection after travel to malaysian borneo, september 2014,” *Emerging in-*  
255 *fectious diseases*, vol. 21, no. 5, p. 911, 2015.
- 256 [27] J. Olson, T. Ksiazek, D. Gubler, S. Lubis, G. Simanjuntak, V. Lee, S. Nalim, K. Juslis, and  
257 R. See, “A survey for arboviral antibodies in sera of humans and animals in lombok, republic  
258 of indonesia.,” *Annals of tropical medicine and parasitology*, vol. 77, no. 2, pp. 131–137, 1983.
- 259 [28] V. Heang, C. Y. Yasuda, L. Sovann, A. D. Haddow, A. P. Travassos da Rosa, R. B. Tesh,  
260 and M. R. Kasper, “Zika virus infection, cambodia, 2010,” *Emerg Infect Dis*, vol. 18, no. 2,  
261 pp. 349–51, 2012.
- 262 [29] M. T. Alera, L. Hermann, I. A. Tac-An, C. Klungthong, W. Rutvisuttinunt, W. Manasatienkij,  
263 D. Villa, B. Thaisomboonsuk, J. M. Velasco, P. Chinnawirotpisan, *et al.*, “Zika virus infection,  
264 philippines, 2012,” *Emerging infectious diseases*, vol. 21, no. 4, p. 722, 2015.
- 265 [30] R. Buathong, L. Hermann, B. Thaisomboonsuk, W. Rutvisuttinunt, C. Klungthong, P. Chin-  
266 nawirotpisan, W. Manasatienkij, A. Nisalak, S. Fernandez, I.-K. Yoon, *et al.*, “Detection of  
267 zika virus infection in thailand, 2012–2014,” *The American journal of tropical medicine and*  
268 *hygiene*, vol. 93, no. 2, pp. 380–383, 2015.
- 269 [31] G. H. Leung, R. W. Baird, J. Druce, and N. M. Anstey, “Zika virus infection in australia  
270 following a monkey bite in indonesia,” *Southeast Asian Journal of Tropical Medicine and*  
271 *Public Health*, vol. 46, no. 3, p. 460, 2015.
- 272 [32] A. M. Kilbourn, W. B. Karesh, N. D. Wolfe, E. J. Bosi, R. A. Cook, and M. Andau, “Health  
273 evaluation of free-ranging and semi-captive orangutans (*pongo pygmaeus pygmaeus*) in sabah,  
274 malaysia,” *Journal of Wildlife Diseases*, vol. 39, no. 1, pp. 73–83, 2003.
- 275 [33] N. Vasilakis, J. Cardoso, K. A. Hanley, E. C. Holmes, and S. C. Weaver, “Fever from the  
276 forest: prospects for the continued emergence of sylvatic dengue virus and its impact on public  
277 health,” *Nat Rev Microbiol*, vol. 9, pp. 532–41, Jul 2011.
- 278 [34] A. D. Haddow, A. J. Schuh, C. Y. Yasuda, M. R. Kasper, V. Heang, R. Huy, H. Guzman, R. B.  
279 Tesh, and S. C. Weaver, “Genetic characterization of zika virus strains: geographic expansion  
280 of the asian lineage,” *PLoS Negl Trop Dis*, vol. 6, no. 2, p. e1477, 2012.

- 281 [35] O. Faye, C. C. Freire, A. Iamarino, O. Faye, J. V. C. de Oliveira, M. Diallo, P. M. Zanutto,  
282 *et al.*, “Molecular evolution of zika virus during its emergence in the 20 th century,” *PLoS Negl*  
283 *Trop Dis*, vol. 8, no. 1, p. e2636, 2014.
- 284 [36] N. Berthet, E. Nakouné, B. Kamgang, B. Selekon, S. Descorps-Declère, A. Gessain, J.-C.  
285 Manuguerra, and M. Kazanji, “Molecular characterization of three zika flaviviruses obtained  
286 from sylvatic mosquitoes in the central african republic,” *Vector-Borne and Zoonotic Diseases*,  
287 vol. 14, no. 12, pp. 862–865, 2014.
- 288 [37] B. M. Althouse, K. A. Hanley, M. Diallo, A. A. Sall, Y. Ba, O. Faye, D. Diallo, D. M. Watts,  
289 S. C. Weaver, and D. A. Cummings, “Impact of climate and mosquito vector abundance on  
290 sylvatic arbovirus circulation dynamics in senegal,” *The American journal of tropical medicine*  
291 *and hygiene*, vol. 92, no. 1, pp. 88–97, 2015.
- 292 [38] D. Diallo, A. A. Sall, C. T. Diagne, O. Faye, O. Faye, Y. Ba, K. A. Hanley, M. Buenemann,  
293 S. C. Weaver, and M. Diallo, “Zika virus emergence in mosquitoes in southeastern senegal,  
294 2011,” *PloS one*, vol. 9, no. 10, p. e109442, 2014.
- 295 [39] C. T. Diagne, D. Diallo, O. Faye, Y. Ba, O. Faye, A. Gaye, I. Dia, S. C. Weaver, A. A. Sall,  
296 and M. Diallo, “Potential of selected senegalese aedes spp. mosquitoes (diptera: Culicidae) to  
297 transmit zika virus,” *BMC infectious diseases*, vol. 15, no. 1, p. 492, 2015.
- 298 [40] J. F. Chan, G. K. Choi, C. C. Yip, V. C. Cheng, and K.-Y. Yuen, “Zika fever and congenital  
299 zika syndrome: An unexpected emerging arboviral disease?,” *Journal of Infection*, 2016.
- 300 [41] B. M. Althouse, J. Lessler, A. A. Sall, M. Diallo, K. A. Hanley, D. M. Watts, S. C. Weaver,  
301 and D. A. T. Cummings, “Synchrony of sylvatic dengue isolations: a multi-host, multi-vector  
302 SIR model of dengue virus transmission in Senegal,” *PLoS Negl Trop Dis*, vol. 6, p. e1928, Nov  
303 2012.
- 304 [42] B. M. Althouse and K. A. Hanley, “The tortoise or the hare? impacts of within-host dynamics  
305 on transmission success of arthropod-borne viruses,” *Phil. Trans. R. Soc. B*, vol. 370, no. 1675,  
306 p. 20140299, 2015.
- 307 [43] S. C. Alberts, J. Altmann, D. K. Brockman, M. Cords, L. M. Fedigan, A. Pusey, T. S. Stoinski,  
308 K. B. Strier, W. F. Morris, and A. M. Bronikowski, “Reproductive aging patterns in primates  
309 reveal that humans are distinct,” *Proceedings of the National Academy of Sciences*, vol. 110,  
310 no. 33, pp. 13440–13445, 2013.
- 311 [44] B. M. Althouse, A. P. Durbin, K. A. Hanley, S. B. Halstead, S. C. Weaver, and D. A. Cummings,  
312 “Viral kinetics of primary dengue virus infection in non-human primates: a systematic review  
313 and individual pooled analysis,” *Virology*, vol. 452, pp. 237–246, 2014.
- 314 [45] M. A. Darwish, H. Hoogstraal, T. J. Roberts, I. P. Ahmed, and F. Omar, “A sero-  
315 epidemiological survey for certain arboviruses (togaviridae) in pakistan,” *Transactions of the*  
316 *Royal Society of Tropical Medicine and Hygiene*, vol. 77, no. 4, pp. 442–445, 1983.
- 317 [46] M. U. Kraemer, M. E. Sinka, K. A. Duda, A. Q. Mylne, F. M. Shearer, C. M. Barker, C. G.  
318 Moore, R. G. Carvalho, G. E. Coelho, W. Van Bortel, *et al.*, “The global distribution of the  
319 arbovirus vectors aedes aegypti and ae. albopictus,” *Elife*, vol. 4, p. e08347, 2015.
- 320 [47] C. for Disease Control (CDC *et al.*, “International task force for disease eradication.,” *MMWR.*  
321 *Morbidity and mortality weekly report*, vol. 39, no. 13, p. 209, 1990.

- 322 [48] A. P. M. Romano, Z. G. A. Costa, D. G. Ramos, M. A. Andrade, V. de Sá Jayme, M. A. B.  
 323 de Almeida, K. C. Vettorello, M. Mascheretti, and B. Flannery, “Yellow fever outbreaks in  
 324 unvaccinated populations, brazil, 2008–2009,” *PLoS Negl Trop Dis*, vol. 8, no. 3, p. e2740,  
 325 2014.

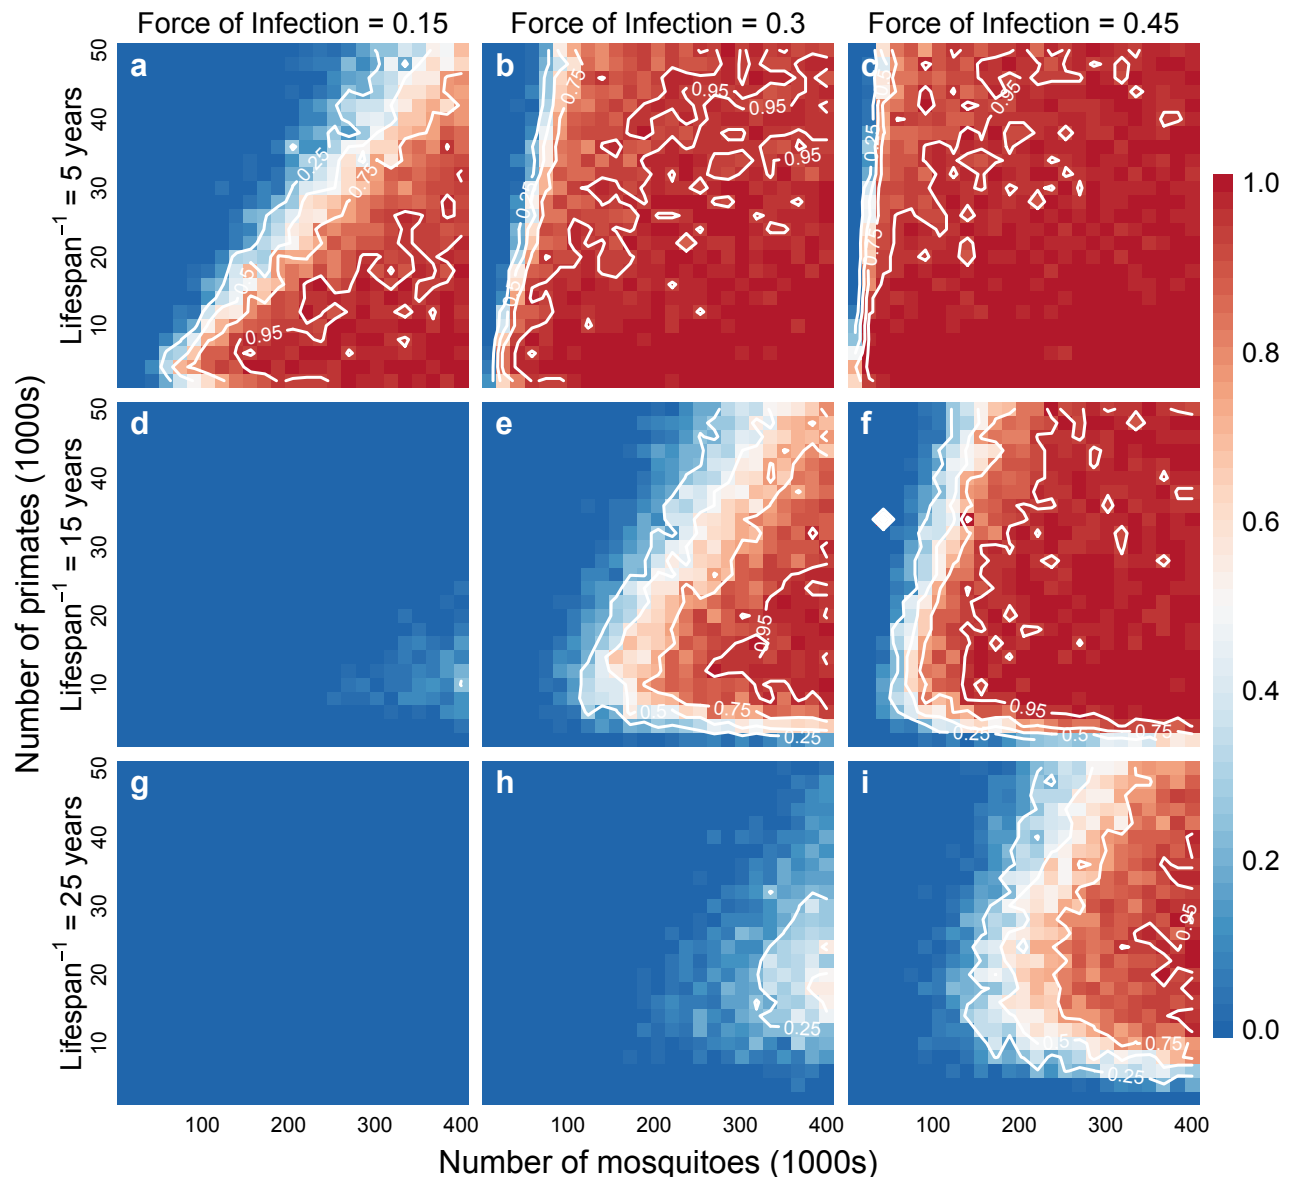

**Figure 1: Figure 1 Probability of establishing a sylvatic ZIKV transmission cycle.**

Figure shows heat maps of the probability of ZIKV establishment in 50 simulations per parameter set with colors ranging from blue (0 simulations establishing) to red (all simulations establishing). Contour lines show 0.25, 0.5, 0.75, and 0.95 probability of establishment. For each plot, the x-axis shows the total number of mosquitoes (in two populations) and the y-axis shows the total number of non-human primates (in two populations). Left to right the panels indicate increasing in force of infection, and top to bottom decreasing non-human primate birthrate (as 1/lifespan)<sup>15</sup>. Other parameters: mean mosquito lifespan = 7 days; mean ZIKV recovery in NHP = 4 days; mosquito vertical transmission of ZIKV = 0; rate of yearly ZIKV introduction = 0.
